# Supplementary material
Source: MDPI journal article supplement (https://www.mdpi.com/2073-4395/14/5/1053)

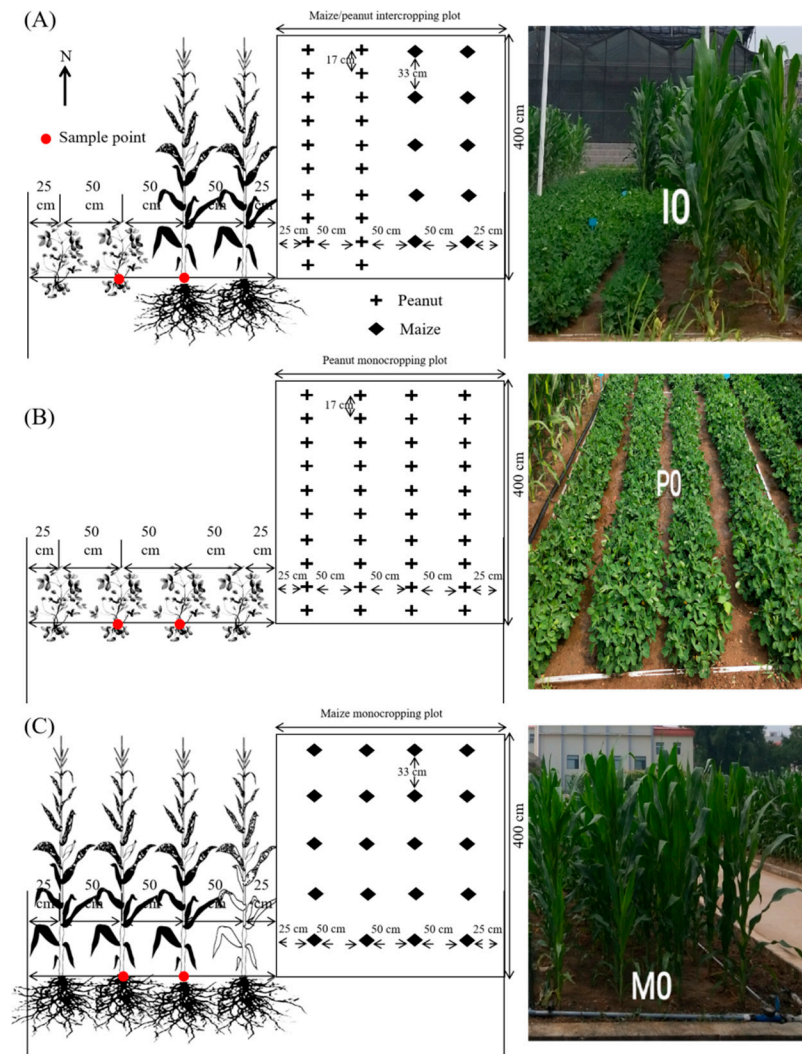

**Supplementary Figure S1.** Diagram of experimental design and soil sampling spot.

Supplement: s1 [file s1]
